# Supplementary material for: Skd3 (human ClpB) is a potent mitochondrial protein disaggregase that is inactivated by 3-methylglutaconic aciduria-linked mutations
Source: eLife journal article supplement (doi:10.7554/elife.55279), 2020-06-23
Supplement: supp [file elife-55279-supp-v1.zip]

|            |     |                                                               |
|------------|-----|---------------------------------------------------------------|
| Skd3NBD    | 328 | ----KREAFERRRFPLEQRLKEHIIGQESAIATVGAAIRRKENGWYDEEHP-LVFLFLGS  |
| Hsp104NBD2 | 557 | PVKLSESENEKLIHMERDLSSEVVGQMDAIAKAVSNAVRLSRSGLANPRQP-ASFLFLGL  |
| Hsp78NBD2  | 483 | PTETVMKGDKDRLLYMENSLKERVVGQDEAIAAISDAVRLQAGLTSEKRPIASFMFLGP   |
| ClpBNBD2   | 548 | -VSRMMESEREKLLRMEQELHHRVIGQNEAVDAVSNAIRRSRAGLADPNRPIGSFLFLGP  |
| ClpANBD2   | 437 | PEKSVSOSDRDTLKNLGDRLKMLVFGQDKAIEALTEAIKMARAGLGHEHKPVGSFLFAGP  |
| ClpCNBD    | 487 | PLTKINETESEKLLSLEDTLHERVIGQKDAVNSISKAVRRRARAGLKDPKRPIGSFIFLGP |
| consensus  | 1   | pv kl esekekll leq LkerviGQeAi avs Airr raGlad rrPigsFlFlGP   |

#### Walker A

#### Pore Loop

|            |     |                                                              |
|------------|-----|--------------------------------------------------------------|
| Skd3NBD    | 383 | SGIGKTELAKQTAKYMHKDAKKGFIRLDMSEFQERHEVAKFIGSPPGYVGHEEGGQLTKK |
| Hsp104NBD2 | 616 | SGSGKTELAKKVAGFLFNDE-DMMIRVDCSELSEKYAVSKLLGTTAGYVGDEGGFLTNQ  |
| Hsp78NBD2  | 543 | TGTGKTELTKALAEFLFDDE-SNVIRFDMSEFQEKHTVSRLIGAPPGYVLSSEGGQLTEA |
| ClpBNBD2   | 607 | TGVGKTELCKALANFMFDS-D-EAMVRIDMSEFMKHSVSRLVGAPPGYVGHEEGGYLTEA |
| ClpANBD2   | 497 | TGVGKTEVTVOLSKAL---G-IELLRFDMSEYMERHTVSRLIGAPPGYVGFDGGLLTDA  |
| ClpCNBD    | 547 | TGVGKTELARALAESMFDD-DAMIRVDMSEFMKHAHSVRLVGAPPGYVGHDGGQLTEK   |
| consensus  | 61  | tGvGKTELakala fmf de dgmiRlDmSEfmEkhtVsrlIGappGYVgyeeGGqLTea |

#### Walker B

#### Sensor I

|            |     |                                                               |
|------------|-----|---------------------------------------------------------------|
| Skd3NBD    | 443 | LKQCPNAVVLFDDEVKAHPDVLTIMLQLFDEGRITDGKGKTIDCKDAIFIMTSN/VASDEI |
| Hsp104NBD2 | 675 | LQYKPYSVLLFDEVEKAHPDVLTVMQLDDGRITSGQGKTIDCSNCIVIMTSNLGAEFI    |
| Hsp78NBD2  | 602 | VRRKPYAVVLFDDEVKAHPDVSKLLQLVLDGKLTDSLGHVDFRNTIIVIMTSNLGQDIL   |
| ClpBNBD2   | 666 | VRRRPYSVILLFDEVEKAHPDVFNILLQVLDDGRLTDGQGRTVDFRNTTVIMTSNLGSDLI |
| ClpANBD2   | 553 | VIKHPHAVILLDFEIEKAHPDVFNILLQVMDNGTLTDNNGRKADFRNVVLVMTINAGVRET |
| ClpCNBD    | 606 | VRRKPYSVILFDIEKAHPDVFNILLQVLDDGHLTDTKGRTVDFRNTIIVIMTSN/GAQEL  |
| consensus  | 121 | vrkPy VvLfDeveKAHPDVfnillQvldDGrLTdgqGrtvDfrntiviMTsNvg dei   |

#### R-Finger

|            |     |                                                               |
|------------|-----|---------------------------------------------------------------|
| Skd3NBD    | 503 | AQHALLQLRQEALEMSRNRIAENLGDVQISDKITISKNFKENVIRPILKAHFRRDEFGLRI |
| Hsp104NBD2 | 735 | NSQQ-----GS-----KIQESTKN-LVMGAVRQH-FRPEFLNRI                  |
| Hsp78NBD2  | 662 | LNDTKLGDD-----GKID-----TATKN-KVIEAMKRS-YFPEFINRI              |
| ClpBNBD2   | 726 | QER-F-----GE-----LDYAHMKE-LVLGVVSHN-FRPEFINRI                 |
| ClpANBD2   | 613 | ERKS-----IG-----LIHQDNST-DAMEEIKKI-FTPEFRNRI                  |
| ClpCNBD    | 666 | QDQRFAGFG-----GSSDG-----QDYETIRK-TMLKELKNS-FRPEFLNRI          |
| consensus  | 181 | n h g i k vvm lkr frpEflnRi                                   |

#### Sensor II

|            |     |                                                                |
|------------|-----|----------------------------------------------------------------|
| Skd3NBD    | 563 | NEIVYFLPFCHSELIQLVNKELNFWAKRAKQ--RHNITLLWDREVADVLVDGYNVHYGAR   |
| Hsp104NBD2 | 767 | SSIVIFNKLRSKAIHKIVDIRLKEIEERFEQNDKHYKLNLTQEAKDFLAKYGYSDDMGAR   |
| Hsp78NBD2  | 698 | DDIIVFNRLSKKVLRSIVDIRIAEIQDRLAEE--KRMKIDLTDEAKDWLTDKGYDQLYGAR  |
| ClpBNBD2   | 758 | DEVVVFHPLGEQHIASTAOIQLKRLYKRLEE--RGYEIHISDEALKLLSENGYDPVYGAR   |
| ClpANBD2   | 645 | DNIIWFHDLSTDVIHQVVDKFIVELQVQLDQ--KGVSLSEVSQEARNWLAEEKGYDRAMGAR |
| ClpCNBD    | 706 | DDIIVFHKLTKELKEIVTMMVNKLITNRLSE--QNINIIVTDKAKDKIAEEGYDPEYGAR   |
| consensus  | 241 | deivvf klsh lh ivdi l el rle khm i ltdeakdflae GyD yGAR        |

#### C-Terminal Domain

|            |     |                                                                |
|------------|-----|----------------------------------------------------------------|
| Skd3NBD    | 621 | SIKHEVERRVNVQLAAAYEQDLLPGGCTLRITVEDSDKQLLKSPLEPSP-----QAQKR    |
| Hsp104NBD2 | 827 | PLNRLIQNEIILNKLALRILKNEIKDKETVNVVLKKGKSRDENVPPEAAEECLEVLPNHEAT |
| Hsp78NBD2  | 756 | PLNRLIHRQILNSMATFLLKGQIRNGETVRVVVKDTKLVLPLNHEEGEVV---EEEEAK-   |
| ClpBNBD2   | 816 | PLKRAIQQIENPLAQQILSGELVPGKVIRLEVNEEDRIVAVQ-----                |
| ClpANBD2   | 703 | PMARVIQDNLKKPLANELLFGLSLVDGGQVTVALDKEKNELTYGFQSAQKHK-AEAAH---  |
| ClpCNBD    | 764 | PLIRAIQKTIEDNLSELILDGNQIEGKKVTVDHGKEFKYDIAEQTSETK---TPSQA---   |
| consensus  | 301 | pl rliqrqivn la il g lvdg tivr vvd k ll e ae e                 |

|            |     |                                   |
|------------|-----|-----------------------------------|
| Skd3NBD    | 675 | LPKLRLEIIDKDSKTRRLDIRAPLHPEKVCNTI |
| Hsp104NBD2 | 887 | I---GADTLGDDDDNEDSMEIDDDLD-----   |
| Hsp78NBD2  |     | -----                             |
| ClpBNBD2   |     | -----                             |
| ClpANBD2   |     | -----                             |
| ClpCNBD    |     | -----                             |
| consensus  | 361 |                                   |
