# Supplementary material for: Skd3 (human ClpB) is a potent mitochondrial protein disaggregase that is inactivated by 3-methylglutaconic aciduria-linked mutations
Source: eLife. 2020 Jun 23;9:e55279. doi: 10.7554/eLife.55279 (PMC7343390; doi:10.7554/eLife.55279)
Supplement: Supplementary file 3. — Proteins from mass spectrometry data in Figure 7b highlighted in green that have >2.0 fold change increase in the wild-type insoluble fraction compared to ΔCLPB and a p-value of <0.05. [file elife-55279-supp3.xlsx]

## Sheet: Sheet1
	Table S2: Proteins enriched in HAP1 WT pellet. Proteins from mass spectrometry data in Figure 7b highlighted in green that have >2.0 fold change increase in the wild-type insoluble fraction compared to ΔCLPB and a p-value of <0.05.
Majority protein IDs	Protein names	Gene names	Fasta headers	p-value dCLPB/WT	FoldChange dCLPB/WT	log2(fold change)	-log10(p-value)
B3KMB8;A0A024R419;Q9NYY8;Q9NYY8-2	FAST kinase domain-containing protein 2	KIAA0971;FASTKD2	tr|B3KMB8|B3KMB8_HUMAN cDNA FLJ10654 fis, clone NT2RP2005901, highly similar to FAST kinase domains-containing protein 2 OS=Homo sapiens OX=9606 PE=2 SV=1;tr|A0A024R419|A0A024R419_HUMAN KIAA0971, isoform CRA_b OS=Homo sapiens OX=9606 GN=KIAA0971 PE=4 SV=1;	0.000470973	-501.146	-8.96909	3.327
P16070;P16070-4;A0A385KNS5;B4DN59;H0Y2P0;A8K309;H0YD13;P16070-5;P16070-7;P16070-3;P16070-6;P16070-8;P16070-17;P16070-14;P16070-18;P16070-12;P16070-13;P16070-10;P16070-16;P16070-11;B4E2X0;H0YE40	CD44 antigen	CD44	sp|P16070|CD44_HUMAN CD44 antigen OS=Homo sapiens OX=9606 GN=CD44 PE=1 SV=3;sp|P16070-4|CD44_HUMAN Isoform 4 of CD44 antigen OS=Homo sapiens OX=9606 GN=CD44;tr|A0A385KNS5|A0A385KNS5_HUMAN Indian blood group antigen OS=Homo sapiens OX=9606 GN=CD44 PE=4 SV=1	7.2205e-10	-193.129	-7.59342	9.14143
A8K7J6;Q86TS9-3;Q86TS9;G5E9P5	39S ribosomal protein L52, mitochondrial	MRPL52	tr|A8K7J6|A8K7J6_HUMAN cDNA FLJ76418, highly similar to Homo sapiens mitochondrial ribosomal protein L52 (MRPL52), transcript variant 1, mRNA OS=Homo sapiens OX=9606 PE=1 SV=1;sp|Q86TS9-3|RM52_HUMAN Isoform 3 of 39S ribosomal protein L52, mitochondrial OS=	3.48437e-05	-81.775	-6.35359	4.45788
B2RD09;Q63ZY6-4;Q63ZY6-5;Q63ZY6;Q96P11-5;Q96P11;Q96P11-2;Q96P11-4	Putative methyltransferase NSUN5C;Probable 28S rRNA (cytosine-C(5))-methyltransferase	NSUN5P2;NSUN5	tr|B2RD09|B2RD09_HUMAN cDNA, FLJ96406, highly similar to Homo sapiens NOL1/NOP2/Sun domain family, member 5 (NSUN5), transcript variant 1, mRNA OS=Homo sapiens OX=9606 PE=2 SV=1;sp|Q63ZY6-4|NSN5C_HUMAN Isoform 3 of Putative methyltransferase NSUN5C OS=Homo	0.0157722	-69.67	-6.12247	1.80211
G1UI17;A0A0S2A4E4;A0A0M4G3H8;P35573-2;P35573-3;P35573	Glycogen debranching enzyme;4-alpha-glucanotransferase;Amylo-alpha-1,6-glucosidase	AGL	tr|G1UI17|G1UI17_HUMAN Glycogen debranching enzyme (Fragment) OS=Homo sapiens OX=9606 GN=AGL PE=2 SV=1;tr|A0A0S2A4E4|A0A0S2A4E4_HUMAN Amylo-1, 6-glucosidase, 4-alpha-glucanotransferase (Glycogen debranching enzyme, glycogen storage disease type III), isofo	4.92368e-05	-61.5128	-5.94282	4.30771
O15091-2;O15091;O15091-4	Mitochondrial ribonuclease P protein 3	KIAA0391	sp|O15091-2|MRPP3_HUMAN Isoform 2 of Mitochondrial ribonuclease P catalytic subunit OS=Homo sapiens OX=9606 GN=PRORP;sp|O15091|MRPP3_HUMAN Mitochondrial ribonuclease P catalytic subunit OS=Homo sapiens OX=9606 GN=PRORP PE=1 SV=2;sp|O15091-4|MRPP3_HUMAN Iso	0.0352745	-60.9452	-5.92944	1.45254
Q16891;Q16891-4;B9A067;B4DQY2;Q16891-3;B4DKR1;B4DT20	MICOS complex subunit MIC60	IMMT	sp|Q16891|MIC60_HUMAN MICOS complex subunit MIC60 OS=Homo sapiens OX=9606 GN=IMMT PE=1 SV=1;sp|Q16891-4|MIC60_HUMAN Isoform 4 of MICOS complex subunit MIC60 OS=Homo sapiens OX=9606 GN=IMMT;tr|B9A067|B9A067_HUMAN MICOS complex subunit MIC60 OS=Homo sapiens	7.77607e-05	-53.4932	-5.74128	4.10924
A0A384NKJ3;P42126-2;P42126;Q96DC0;H3BS70	Enoyl-CoA delta isomerase 1, mitochondrial	ECI1;DCI	tr|A0A384NKJ3|A0A384NKJ3_HUMAN Epididymis secretory sperm binding protein OS=Homo sapiens OX=9606 PE=2 SV=1;sp|P42126-2|ECI1_HUMAN Isoform 2 of Enoyl-CoA delta isomerase 1, mitochondrial OS=Homo sapiens OX=9606 GN=ECI1;sp|P42126|ECI1_HUMAN Enoyl-CoA delta	0.0351101	-46.9111	-5.55186	1.45457
Q05639;A0A2U3TZH3;Q59GP5	Elongation factor 1-alpha 2	EEF1A2	sp|Q05639|EF1A2_HUMAN Elongation factor 1-alpha 2 OS=Homo sapiens OX=9606 GN=EEF1A2 PE=1 SV=1;tr|A0A2U3TZH3|A0A2U3TZH3_HUMAN Elongation factor 1-alpha OS=Homo sapiens OX=9606 GN=EEF1A2 PE=1 SV=1;tr|Q59GP5|Q59GP5_HUMAN Eukaryotic translation elongation fact	1.8362e-05	-40.9821	-5.35692	4.73608
Q9NZE8	39S ribosomal protein L35, mitochondrial	MRPL35	sp|Q9NZE8|RM35_HUMAN 39S ribosomal protein L35, mitochondrial OS=Homo sapiens OX=9606 GN=MRPL35 PE=1 SV=3	6.71746e-05	-39.2124	-5.29324	4.1728
A0A024RAC0;Q86V48-2;Q86V48-3;Q86V48	Leucine zipper protein 1	LUZP1	tr|A0A024RAC0|A0A024RAC0_HUMAN Leucine zipper protein 1, isoform CRA_a OS=Homo sapiens OX=9606 GN=LUZP1 PE=4 SV=1;sp|Q86V48-2|LUZP1_HUMAN Isoform 2 of Leucine zipper protein 1 OS=Homo sapiens OX=9606 GN=LUZP1;sp|Q86V48-3|LUZP1_HUMAN Isoform 3 of Leucine zi	0.00108139	-37.4196	-5.22572	2.96602
Q9UHQ9;H7C0R7	NADH-cytochrome b5 reductase 1	CYB5R1	sp|Q9UHQ9|NB5R1_HUMAN NADH-cytochrome b5 reductase 1 OS=Homo sapiens OX=9606 GN=CYB5R1 PE=1 SV=1;tr|H7C0R7|H7C0R7_HUMAN NADH-cytochrome b5 reductase 1 (Fragment) OS=Homo sapiens OX=9606 GN=CYB5R1 PE=1 SV=1	0.0411108	-34.6164	-5.11339	1.38604
A0A024RDM4;Q9BQC6	Ribosomal protein 63, mitochondrial	MRP63;MRPL57	tr|A0A024RDM4|A0A024RDM4_HUMAN Mitochondrial ribosomal protein 63, isoform CRA_a OS=Homo sapiens OX=9606 GN=MRP63 PE=4 SV=1;sp|Q9BQC6|RT63_HUMAN Ribosomal protein 63, mitochondrial OS=Homo sapiens OX=9606 GN=MRPL57 PE=1 SV=1	0.0436489	-32.5804	-5.02593	1.36003
K7EJX5;B4DSA4;K7ELX4;A0A499FJN5;Q7KZA3;Q53FU1;Q5TZY0;P22830;P22830-2	Ferrochelatase;Ferrochelatase, mitochondrial	FECH;DKFZp686P18130	tr|K7EJX5|K7EJX5_HUMAN Ferrochelatase (Fragment) OS=Homo sapiens OX=9606 GN=FECH PE=1 SV=1;tr|B4DSA4|B4DSA4_HUMAN Ferrochelatase OS=Homo sapiens OX=9606 PE=2 SV=1;tr|K7ELX4|K7ELX4_HUMAN Ferrochelatase, mitochondrial (Fragment) OS=Homo sapiens OX=9606 GN=FE	0.000112843	-30.2149	-4.91719	3.94753
C9J8Q5;X5DNC0;X5DQN2;X5D8T4;A8K435;X5D299;P51649;P51649-2;B4DGP6	Succinate-semialdehyde dehydrogenase, mitochondrial	ALDH5A1	tr|C9J8Q5|C9J8Q5_HUMAN Succinate-semialdehyde dehydrogenase OS=Homo sapiens OX=9606 GN=ALDH5A1 PE=1 SV=1;tr|X5DNC0|X5DNC0_HUMAN Aldehyde dehydrogenase 5 family member A1 isoform C (Fragment) OS=Homo sapiens OX=9606 GN=ALDH5A1 PE=2 SV=1;tr|X5DQN2|X5DQN2_HUM	0.00347977	-25.768	-4.68751	2.45845
F8WDY6;F8VVF2;H0YHM6;A0A0J9YWF7;A0A1B0GTY9;A0A384MDZ8;A0A1B0GUA1;A0A1B0GTG2;A0A1B0GW82;A0A1B0GW77;P49419-4;P49419-2;P49419	Alpha-aminoadipic semialdehyde dehydrogenase	ALDH7A1	tr|F8WDY6|F8WDY6_HUMAN Alpha-aminoadipic semialdehyde dehydrogenase OS=Homo sapiens OX=9606 GN=ALDH7A1 PE=1 SV=2;tr|F8VVF2|F8VVF2_HUMAN Alpha-aminoadipic semialdehyde dehydrogenase (Fragment) OS=Homo sapiens OX=9606 GN=ALDH7A1 PE=1 SV=2;tr|H0YHM6|H0YHM6_HU	0.000373981	-25.605	-4.67835	3.42715
O75970-5;O75970-3;O75970-2;O75970;F5H1U9;H0YGQ3	Multiple PDZ domain protein	MPDZ	sp|O75970-5|MPDZ_HUMAN Isoform 4 of Multiple PDZ domain protein OS=Homo sapiens OX=9606 GN=MPDZ;sp|O75970-3|MPDZ_HUMAN Isoform 3 of Multiple PDZ domain protein OS=Homo sapiens OX=9606 GN=MPDZ;sp|O75970-2|MPDZ_HUMAN Isoform 2 of Multiple PDZ domain protein	0.0314478	-25.183	-4.65438	1.50241
Q2NLC8;E9PFN5;Q6FII1;Q9Y2Q3-4;Q9Y2Q3;Q9Y2Q3-3;Q9Y2Q3-2	Glutathione S-transferase kappa 1	GSTK1;LOC51064	tr|Q2NLC8|Q2NLC8_HUMAN GSTK1 protein (Fragment) OS=Homo sapiens OX=9606 GN=GSTK1 PE=2 SV=1;tr|E9PFN5|E9PFN5_HUMAN Glutathione S-transferase kappa OS=Homo sapiens OX=9606 GN=GSTK1 PE=1 SV=1;tr|Q6FII1|Q6FII1_HUMAN Glutathione S-transferase kappa OS=Homo sapi	0.00167052	-24.4251	-4.61029	2.77715
M0R226;A0A024R7J4;Q9BQ48	Ribosomal protein L34;39S ribosomal protein L34, mitochondrial	MRPL34	tr|M0R226|M0R226_HUMAN 39S ribosomal protein L34, mitochondrial OS=Homo sapiens OX=9606 GN=MRPL34 PE=1 SV=1;tr|A0A024R7J4|A0A024R7J4_HUMAN Mitochondrial ribosomal protein L34, isoform CRA_a OS=Homo sapiens OX=9606 GN=MRPL34 PE=4 SV=1;sp|Q9BQ48|RM34_HUMAN 3	0.0475769	-21.6934	-4.43918	1.3226
B3KWE1;Q52NV4;P12081-3;P12081-2;P12081-4;P12081;E7ETE2;B4DEA2;B4E1C5;B4DDD8	Histidine--tRNA ligase, cytoplasmic	HARS;HRS	tr|B3KWE1|B3KWE1_HUMAN Histidine--tRNA ligase, cytoplasmic OS=Homo sapiens OX=9606 GN=HARS PE=1 SV=1;tr|Q52NV4|Q52NV4_HUMAN Histidyl-tRNA synthetase OS=Homo sapiens OX=9606 GN=HRS PE=2 SV=1;sp|P12081-3|SYHC_HUMAN Isoform 3 of Histidine--tRNA ligase, cytopl	0.00302597	-17.1617	-4.10112	2.51914
A0A140VK11;Q9H078;A0A2U3TZY2;Q9H078-2;H0YGM0;Q9H078-4;Q9H078-3;Q9H078-5;Q7Z777	Caseinolytic peptidase B protein homolog	CLPB	tr|A0A140VK11|A0A140VK11_HUMAN ClpB caseinolytic peptidase B homolog (E. coli), isoform CRA_a OS=Homo sapiens OX=9606 GN=CLPB PE=2 SV=1;sp|Q9H078|CLPB_HUMAN Caseinolytic peptidase B protein homolog OS=Homo sapiens OX=9606 GN=CLPB PE=1 SV=1;tr|A0A2U3TZY2|A0	0.00962799	-5.86089	-2.55112	2.01646
Q53R49;Q15118;B7Z7N6;Q15118-2;B7Z207	[Pyruvate dehydrogenase (acetyl-transferring)] kinase isozyme 1, mitochondrial	PDK1	tr|Q53R49|Q53R49_HUMAN Protein-serine/threonine kinase (Fragment) OS=Homo sapiens OX=9606 GN=PDK1 PE=3 SV=1;sp|Q15118|PDK1_HUMAN [Pyruvate dehydrogenase (acetyl-transferring)] kinase isozyme 1, mitochondrial OS=Homo sapiens OX=9606 GN=PDK1 PE=1 SV=1;tr|B7Z	0.02525	-4.39971	-2.13741	1.59774
A0A075B730;P58107	Epiplakin	EPPK1	tr|A0A075B730|A0A075B730_HUMAN Epiplakin OS=Homo sapiens OX=9606 GN=EPPK1 PE=1 SV=2;sp|P58107|EPIPL_HUMAN Epiplakin OS=Homo sapiens OX=9606 GN=EPPK1 PE=1 SV=3	0.0360963	-4.20641	-2.07259	1.44254
Q5T653;A0A024RD44;C9IY40	39S ribosomal protein L2, mitochondrial	MRPL2	sp|Q5T653|RM02_HUMAN 39S ribosomal protein L2, mitochondrial OS=Homo sapiens OX=9606 GN=MRPL2 PE=1 SV=2;tr|A0A024RD44|A0A024RD44_HUMAN Mitochondrial ribosomal protein L2, isoform CRA_a OS=Homo sapiens OX=9606 GN=MRPL2 PE=4 SV=1;tr|C9IY40|C9IY40_HUMAN 39S r	0.0128394	-4.06691	-2.02393	1.89146
Q15046;Q15046-2;Q6ZTI3	Lysine--tRNA ligase	KARS	sp|Q15046|SYK_HUMAN Lysine--tRNA ligase OS=Homo sapiens OX=9606 GN=KARS PE=1 SV=3;sp|Q15046-2|SYK_HUMAN Isoform Mitochondrial of Lysine--tRNA ligase OS=Homo sapiens OX=9606 GN=KARS;tr|Q6ZTI3|Q6ZTI3_HUMAN cDNA FLJ44621 fis, clone BRACE2016896, highly simila	0.0253217	-3.69638	-1.88611	1.59651
A0A087X2D5;B4DEF8;Q9BRJ2;A0A0G2JMS5;A0A087WU62	39S ribosomal protein L45, mitochondrial	MRPL45	tr|A0A087X2D5|A0A087X2D5_HUMAN 39S ribosomal protein L45, mitochondrial OS=Homo sapiens OX=9606 GN=MRPL45 PE=1 SV=1;tr|B4DEF8|B4DEF8_HUMAN cDNA FLJ61100, highly similar to 39S ribosomal protein L45, mitochondrial OS=Homo sapiens OX=9606 PE=1 SV=1;sp|Q9BRJ2	0.0162094	-3.63366	-1.86142	1.79023
Q6LES8;E5KSX8;E5KSU5;Q00059;Q00059-2;H7BYN3	Transcription factor A, mitochondrial	TFAM	tr|Q6LES8|Q6LES8_HUMAN TFAM protein (Fragment) OS=Homo sapiens OX=9606 GN=TFAM PE=2 SV=1;tr|E5KSX8|E5KSX8_HUMAN Mitochondrial transcription factor A OS=Homo sapiens OX=9606 PE=4 SV=1;tr|E5KSU5|E5KSU5_HUMAN Mitochondrial transcription factor A OS=Homo sapie	0.020797	-3.62525	-1.85808	1.682
O75431;C9JNK6;C9JAZ1;B7Z9F3;O75431-2;B3KM74	Metaxin-2	MTX2	sp|O75431|MTX2_HUMAN Metaxin-2 OS=Homo sapiens OX=9606 GN=MTX2 PE=1 SV=1;tr|C9JNK6|C9JNK6_HUMAN Metaxin-2 OS=Homo sapiens OX=9606 GN=MTX2 PE=1 SV=1;tr|C9JAZ1|C9JAZ1_HUMAN Metaxin-2 (Fragment) OS=Homo sapiens OX=9606 GN=MTX2 PE=1 SV=1;tr|B7Z9F3|B7Z9F3_HUMAN	0.0200631	-3.48274	-1.80022	1.6976
Q96EL3	39S ribosomal protein L53, mitochondrial	MRPL53	sp|Q96EL3|RM53_HUMAN 39S ribosomal protein L53, mitochondrial OS=Homo sapiens OX=9606 GN=MRPL53 PE=1 SV=1	0.0301849	-3.38257	-1.75812	1.52021
A0A024R473;Q9H9J2	39S ribosomal protein L44, mitochondrial	MRPL44	tr|A0A024R473|A0A024R473_HUMAN Mitochondrial ribosomal protein L44, isoform CRA_a OS=Homo sapiens OX=9606 GN=MRPL44 PE=4 SV=1;sp|Q9H9J2|RM44_HUMAN 39S ribosomal protein L44, mitochondrial OS=Homo sapiens OX=9606 GN=MRPL44 PE=1 SV=1	0.0286024	-3.28766	-1.71706	1.5436
A0A024RBS6;F5H1S9;G8JLB3;E5KMT6;E5KMT5;Q9Y606-2;Q9Y606	tRNA pseudouridine synthase;tRNA pseudouridine synthase A, mitochondrial	PUS1	tr|A0A024RBS6|A0A024RBS6_HUMAN Pseudouridylate synthase 1, isoform CRA_a OS=Homo sapiens OX=9606 GN=PUS1 PE=4 SV=1;tr|F5H1S9|F5H1S9_HUMAN tRNA pseudouridine synthase A OS=Homo sapiens OX=9606 GN=PUS1 PE=1 SV=1;tr|G8JLB3|G8JLB3_HUMAN tRNA pseudouridine synt	0.0470408	-3.2836	-1.71528	1.32753
A4D1E9;A4D1E9-2;C9J8R7;C9JNI1;C9JEQ8	GTP-binding protein 10	GTPBP10	sp|A4D1E9|GTPBA_HUMAN GTP-binding protein 10 OS=Homo sapiens OX=9606 GN=GTPBP10 PE=1 SV=1;sp|A4D1E9-2|GTPBA_HUMAN Isoform 2 of GTP-binding protein 10 OS=Homo sapiens OX=9606 GN=GTPBP10;tr|C9J8R7|C9J8R7_HUMAN GTP-binding protein 10 (Fragment) OS=Homo sapien	0.0442484	-3.19913	-1.67768	1.3541
Q8N983-4;H0Y6Y8;B1AL05;Q8N983-3;Q8N983-2;Q8N983;Q8N983-6;Q8N983-7;A8K4V4;Q86XN0;H0YBU8	39S ribosomal protein L43, mitochondrial	MRPL43	sp|Q8N983-4|RM43_HUMAN Isoform 4 of 39S ribosomal protein L43, mitochondrial OS=Homo sapiens OX=9606 GN=MRPL43;tr|H0Y6Y8|H0Y6Y8_HUMAN 39S ribosomal protein L43, mitochondrial (Fragment) OS=Homo sapiens OX=9606 GN=MRPL43 PE=1 SV=1;tr|B1AL05|B1AL05_HUMAN 39S	0.0415631	-2.93027	-1.55103	1.38129
Q6FI03;Q5U0Q1;Q13283;Q53HH4;Q32P45;B7Z8K4;Q6ZP53	Ras GTPase-activating protein-binding protein 1	G3BP;DKFZp686L1159;G3BP1	tr|Q6FI03|Q6FI03_HUMAN G3BP protein OS=Homo sapiens OX=9606 GN=G3BP PE=2 SV=1;tr|Q5U0Q1|Q5U0Q1_HUMAN Ras-GTPase-activating protein SH3-domain-binding protein OS=Homo sapiens OX=9606 GN=G3BP PE=2 SV=1;sp|Q13283|G3BP1_HUMAN Ras GTPase-activating protein-bind	0.036006	-2.89347	-1.5328	1.44363
F5H702;Q96GC5-3;Q96GC5	39S ribosomal protein L48, mitochondrial	MRPL48	tr|F5H702|F5H702_HUMAN 39S ribosomal protein L48, mitochondrial OS=Homo sapiens OX=9606 GN=MRPL48 PE=1 SV=1;sp|Q96GC5-3|RM48_HUMAN Isoform 2 of 39S ribosomal protein L48, mitochondrial OS=Homo sapiens OX=9606 GN=MRPL48;sp|Q96GC5|RM48_HUMAN 39S ribosomal pr	0.0454816	-2.8805	-1.52632	1.34216
Q96DV4;B2R894	39S ribosomal protein L38, mitochondrial	MRPL38	sp|Q96DV4|RM38_HUMAN 39S ribosomal protein L38, mitochondrial OS=Homo sapiens OX=9606 GN=MRPL38 PE=1 SV=2;tr|B2R894|B2R894_HUMAN Mitochondrial ribosomal protein L38, isoform CRA_b OS=Homo sapiens OX=9606 GN=MRPL38 PE=1 SV=1	0.028629	-2.81098	-1.49107	1.54319
Q6P161	39S ribosomal protein L54, mitochondrial	MRPL54	sp|Q6P161|RM54_HUMAN 39S ribosomal protein L54, mitochondrial OS=Homo sapiens OX=9606 GN=MRPL54 PE=1 SV=1	0.0144865	-2.65428	-1.40832	1.83904
A0A024RAG0;P05186;B2R6Q2;P05186-3;B7Z1D1;P05186-2;Q9UIL5	Alkaline phosphatase;Alkaline phosphatase, tissue-nonspecific isozyme	ALPL	tr|A0A024RAG0|A0A024RAG0_HUMAN Alkaline phosphatase OS=Homo sapiens OX=9606 GN=ALPL PE=3 SV=1;sp|P05186|PPBT_HUMAN Alkaline phosphatase, tissue-nonspecific isozyme OS=Homo sapiens OX=9606 GN=ALPL PE=1 SV=4;tr|B2R6Q2|B2R6Q2_HUMAN Alkaline phosphatase OS=Hom	0.0229934	-2.64101	-1.40109	1.6384
A0A024R578;Q13405;H0YDP7;Q59GE9	39S ribosomal protein L49, mitochondrial	MRPL49	tr|A0A024R578|A0A024R578_HUMAN Mitochondrial ribosomal protein L49, isoform CRA_b OS=Homo sapiens OX=9606 GN=MRPL49 PE=4 SV=1;sp|Q13405|RM49_HUMAN 39S ribosomal protein L49, mitochondrial OS=Homo sapiens OX=9606 GN=MRPL49 PE=1 SV=1;tr|H0YDP7|H0YDP7_HUMAN 3	0.013719	-2.63669	-1.39873	1.86268
A4D1N4;C9JRZ6;Q9NX63;F8WAR4;B7Z1X9	MICOS complex subunit MIC19	CHCHD3	tr|A4D1N4|A4D1N4_HUMAN MICOS complex subunit OS=Homo sapiens OX=9606 GN=CHCHD3 PE=3 SV=1;tr|C9JRZ6|C9JRZ6_HUMAN MICOS complex subunit OS=Homo sapiens OX=9606 GN=CHCHD3 PE=1 SV=2;sp|Q9NX63|MIC19_HUMAN MICOS complex subunit MIC19 OS=Homo sapiens OX=9606 GN=C	0.0291849	-2.57146	-1.36259	1.53484
Q9BYD1;E5RJI7	39S ribosomal protein L13, mitochondrial	MRPL13	sp|Q9BYD1|RM13_HUMAN 39S ribosomal protein L13, mitochondrial OS=Homo sapiens OX=9606 GN=MRPL13 PE=1 SV=1;tr|E5RJI7|E5RJI7_HUMAN 39S ribosomal protein L13, mitochondrial (Fragment) OS=Homo sapiens OX=9606 GN=MRPL13 PE=1 SV=8	0.0208919	-2.55743	-1.3547	1.68002
Q8N5N7;Q8N5N7-2	39S ribosomal protein L50, mitochondrial	MRPL50	sp|Q8N5N7|RM50_HUMAN 39S ribosomal protein L50, mitochondrial OS=Homo sapiens OX=9606 GN=MRPL50 PE=1 SV=2;sp|Q8N5N7-2|RM50_HUMAN Isoform 2 of 39S ribosomal protein L50, mitochondrial OS=Homo sapiens OX=9606 GN=MRPL50	0.0266502	-2.50952	-1.32741	1.5743
Q8WVM0;E5KTM5;A8K0B9	Dimethyladenosine transferase 1, mitochondrial	TFB1M	sp|Q8WVM0|TFB1M_HUMAN Dimethyladenosine transferase 1, mitochondrial OS=Homo sapiens OX=9606 GN=TFB1M PE=1 SV=1;tr|E5KTM5|E5KTM5_HUMAN rRNA adenine N(6)-methyltransferase OS=Homo sapiens OX=9606 GN=TFB1M PE=3 SV=1;tr|A8K0B9|A8K0B9_HUMAN rRNA adenine N(6)-m	0.0421856	-2.49877	-1.32122	1.37484
A0A024RD78;Q6P1L8	39S ribosomal protein L14, mitochondrial	MRPL14	tr|A0A024RD78|A0A024RD78_HUMAN Mitochondrial ribosomal protein L14, isoform CRA_b OS=Homo sapiens OX=9606 GN=MRPL14 PE=3 SV=1;sp|Q6P1L8|RM14_HUMAN 39S ribosomal protein L14, mitochondrial OS=Homo sapiens OX=9606 GN=MRPL14 PE=1 SV=1	0.0356242	-2.45956	-1.2984	1.44825
Q8TAE8;Q7LAX7	Growth arrest and DNA damage-inducible proteins-interacting protein 1	GADD45GIP1	sp|Q8TAE8|G45IP_HUMAN Growth arrest and DNA damage-inducible proteins-interacting protein 1 OS=Homo sapiens OX=9606 GN=GADD45GIP1 PE=1 SV=1;tr|Q7LAX7|Q7LAX7_HUMAN CKII beta binding protein 2 OS=Homo sapiens OX=9606 PE=2 SV=1	0.0262374	-2.37814	-1.24984	1.58108
P08559-4;P08559;A0A024RBX9;P08559-2;P08559-3;A5YPB6;Q53GE3;A5PHJ9	Pyruvate dehydrogenase E1 component subunit alpha, somatic form, mitochondrial;Pyruvate dehydrogenase E1 component subunit alpha	PDHA1;PDHA1/LOC79064	sp|P08559-4|ODPA_HUMAN Isoform 4 of Pyruvate dehydrogenase E1 component subunit alpha, somatic form, mitochondrial OS=Homo sapiens OX=9606 GN=PDHA1;sp|P08559|ODPA_HUMAN Pyruvate dehydrogenase E1 component subunit alpha, somatic form, mitochondrial OS=Homo	0.0423866	-2.34869	-1.23186	1.37277
Q9BYD2;Q5SZR1	39S ribosomal protein L9, mitochondrial	MRPL9	sp|Q9BYD2|RM09_HUMAN 39S ribosomal protein L9, mitochondrial OS=Homo sapiens OX=9606 GN=MRPL9 PE=1 SV=2;tr|Q5SZR1|Q5SZR1_HUMAN 39S ribosomal protein L9, mitochondrial OS=Homo sapiens OX=9606 GN=MRPL9 PE=1 SV=1	0.0301469	-2.29383	-1.19776	1.52076
Q9P015;B2R739;E5RIZ4;E5RHF4	39S ribosomal protein L15, mitochondrial	MRPL15	sp|Q9P015|RM15_HUMAN 39S ribosomal protein L15, mitochondrial OS=Homo sapiens OX=9606 GN=MRPL15 PE=1 SV=1;tr|B2R739|B2R739_HUMAN cDNA, FLJ93269, highly similar to Homo sapiens mitochondrial ribosomal protein L15 (MRPL15), nuclear gene encoding mitochondria	0.0445789	-2.26743	-1.18106	1.35087
Q9NYK5-2;Q9NYK5;C9JG87	39S ribosomal protein L39, mitochondrial	MRPL39	sp|Q9NYK5-2|RM39_HUMAN Isoform 2 of 39S ribosomal protein L39, mitochondrial OS=Homo sapiens OX=9606 GN=MRPL39;sp|Q9NYK5|RM39_HUMAN 39S ribosomal protein L39, mitochondrial OS=Homo sapiens OX=9606 GN=MRPL39 PE=1 SV=3;tr|C9JG87|C9JG87_HUMAN 39S ribosomal pr	0.0428674	-2.26492	-1.17946	1.36787
Q7Z2W9;A0A024R5G7;B4DXI4;Q7Z2W9-2	39S ribosomal protein L21, mitochondrial	MRPL21	sp|Q7Z2W9|RM21_HUMAN 39S ribosomal protein L21, mitochondrial OS=Homo sapiens OX=9606 GN=MRPL21 PE=1 SV=2;tr|A0A024R5G7|A0A024R5G7_HUMAN Mitochondrial ribosomal protein L21, isoform CRA_a OS=Homo sapiens OX=9606 GN=MRPL21 PE=4 SV=1;tr|B4DXI4|B4DXI4_HUMAN c	0.0466059	-2.20428	-1.1403	1.33156
B2R9J4;A0A024RCB2;A6NJD9;A8MVT4;A8MYK1;Q16540;H7C2P7	39S ribosomal protein L23, mitochondrial	MRPL23	tr|B2R9J4|B2R9J4_HUMAN cDNA, FLJ94423, highly similar to Homo sapiens mitochondrial ribosomal protein L23 (MRPL23), nuclear gene encoding mitochondrial protein, mRNA OS=Homo sapiens OX=9606 PE=2 SV=1;tr|A0A024RCB2|A0A024RCB2_HUMAN Mitochondrial ribosomal p	0.0118362	-2.1715	-1.11869	1.92679
P07814;V9GYZ6;Q3KQZ8;B4DKX5;H6WCP5	Bifunctional glutamate/proline--tRNA ligase;Glutamate--tRNA ligase;Proline--tRNA ligase	EPRS	sp|P07814|SYEP_HUMAN Bifunctional glutamate/proline--tRNA ligase OS=Homo sapiens OX=9606 GN=EPRS PE=1 SV=5;tr|V9GYZ6|V9GYZ6_HUMAN Bifunctional glutamate/proline--tRNA ligase (Fragment) OS=Homo sapiens OX=9606 GN=EPRS PE=1 SV=1;tr|Q3KQZ8|Q3KQZ8_HUMAN EPRS p	0.0216139	-2.10712	-1.07527	1.66527
Q53G19;Q9Y3B7;Q9Y3B7-2;Q9Y3B7-3	39S ribosomal protein L11, mitochondrial	MRPL11	tr|Q53G19|Q53G19_HUMAN Mitochondrial ribosomal protein L11 isoform a variant (Fragment) OS=Homo sapiens OX=9606 PE=2 SV=1;sp|Q9Y3B7|RM11_HUMAN 39S ribosomal protein L11, mitochondrial OS=Homo sapiens OX=9606 GN=MRPL11 PE=1 SV=1;sp|Q9Y3B7-2|RM11_HUMAN Isofo	0.0305575	-2.073	-1.05172	1.51488
